# Supplementary material for: Design of Olmesartan Medoxomil-Loaded Nanosponges for Hypertension and Lung Cancer Treatments
Source: MDPI journal article supplement (doi:10.3390/polym13142272), 2021-07-11
Supplement: s1 [file s1]

Article

# Design of Olmesartan Medoxomil-loaded Nanosponges for Hypertension and Lung Cancer Treatments

Bjad K. Almutairy <sup>1</sup>, Abdullah Alshetaili <sup>1</sup>, Amer S. Alali <sup>1</sup>, Mohammed Muqtader Ahmed <sup>1</sup>, Md. Khalid Anwer <sup>1,\*</sup> and M. Ali Aboudzadeh <sup>2,\*</sup>

<sup>1</sup> Department of Pharmaceutics, College of Pharmacy, Prince Sattam Bin Abdulaziz University, Alkharj 11942, Saudi Arabia; b.almutairy@psau.edu.sa (B.K.A.); a.alshetaili@psau.edu.sa (A.A.); a.alali@psau.edu.sa (A.A.); mo.ahmed@psau.edu.sa (M.M.A.)

<sup>2</sup> CNRS, University Pau & Pays Adour, E2S UPPA, Institut des Sciences Analytiques et de Physico-Chimie pour l'Environnement et les Matériaux, 64000 Pau, France

\* Correspondence: mkanwer2002@yahoo.co.in (M.K.A.); m.aboudzadeh-barihi@univ-pau.fr (M.A.A.)

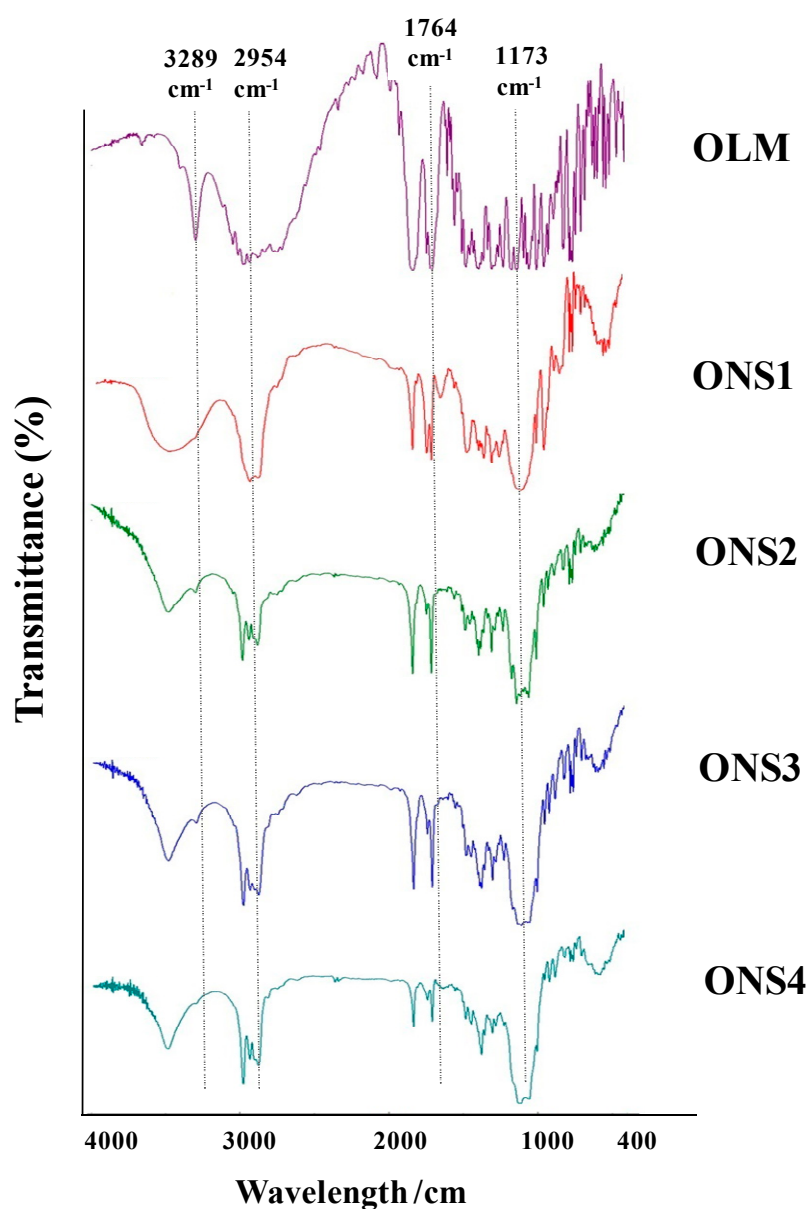

**Figure S1.** FTIR spectrum of the pure OLM and OLM-loaded nanosponge carriers. The main characteristic peaks of the pure OLM are shown with dotted vertical lines. These peaks are present, weakened or shifted in OLM-loaded nanosponges (ONS1-ONS4).

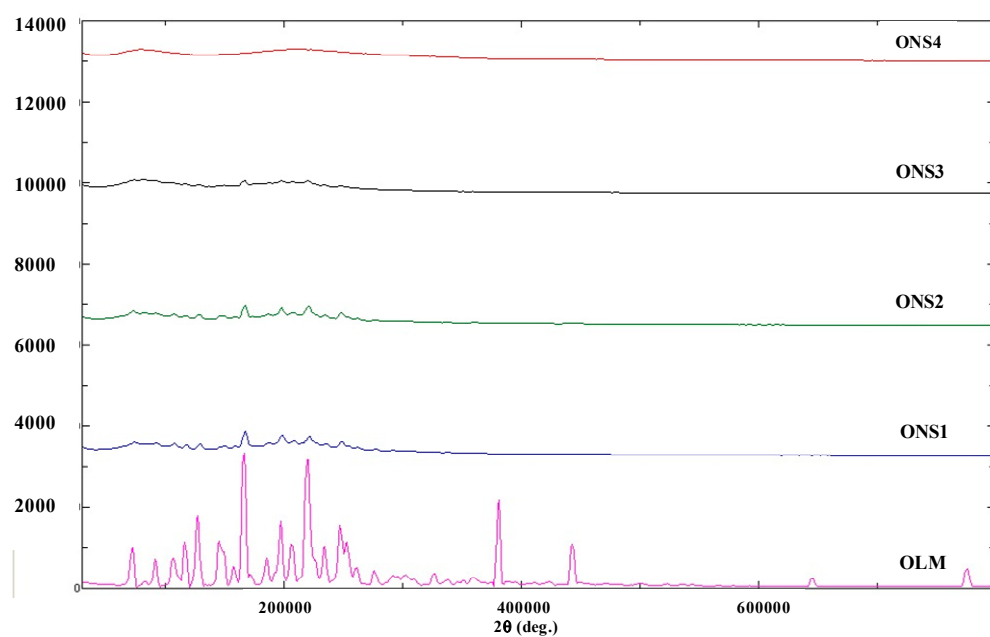

Figure S2. Comparative XRD diffractograms of the pure OLM and OLM-loaded nanosponge.

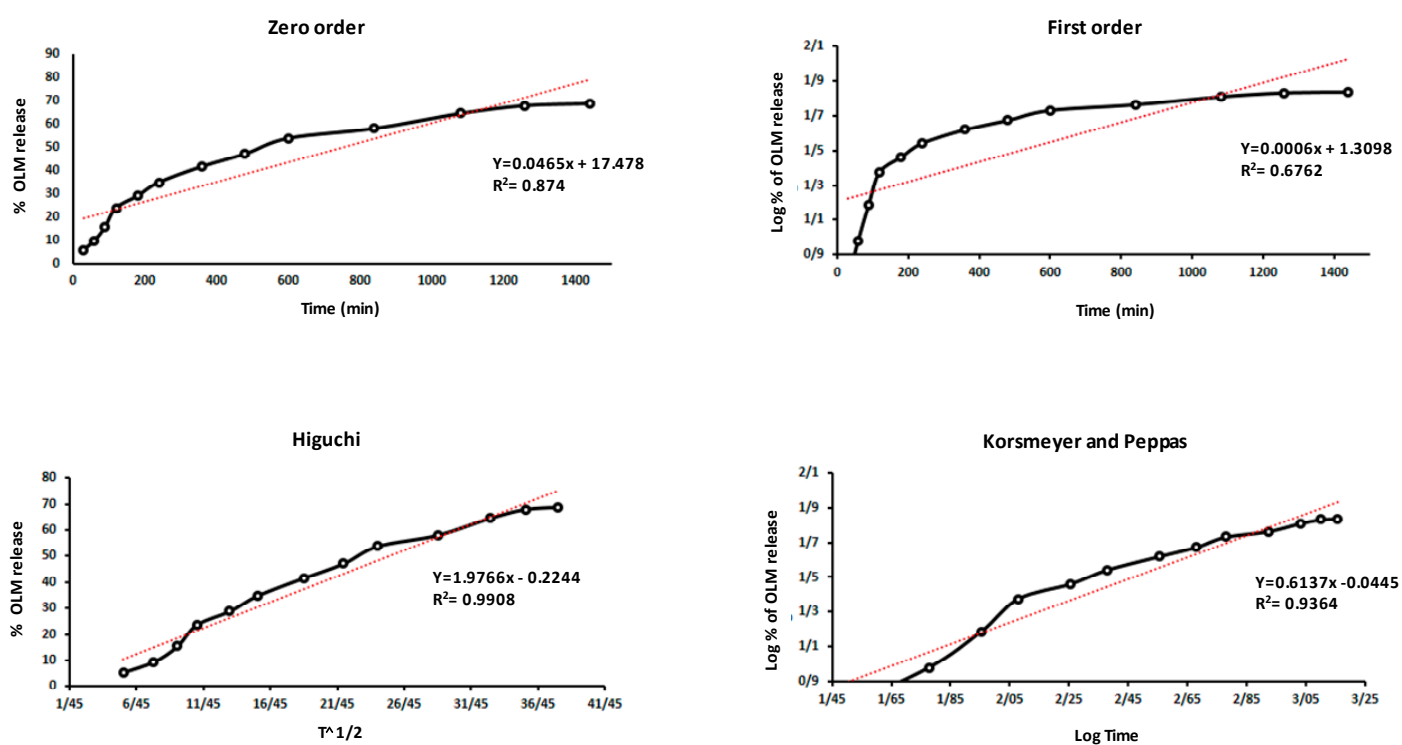

Figure S3. Profiles of different kinetic models for release mechanism of OLM from OLM-loaded nanosponges.
